# Supplementary material
Source: PubMed Central journal article supplement (PMC6608568)
Supplement: NIHMS1521597-supplement-1.pdf [file NIHMS1521597-supplement-1.pdf]

Figure E1

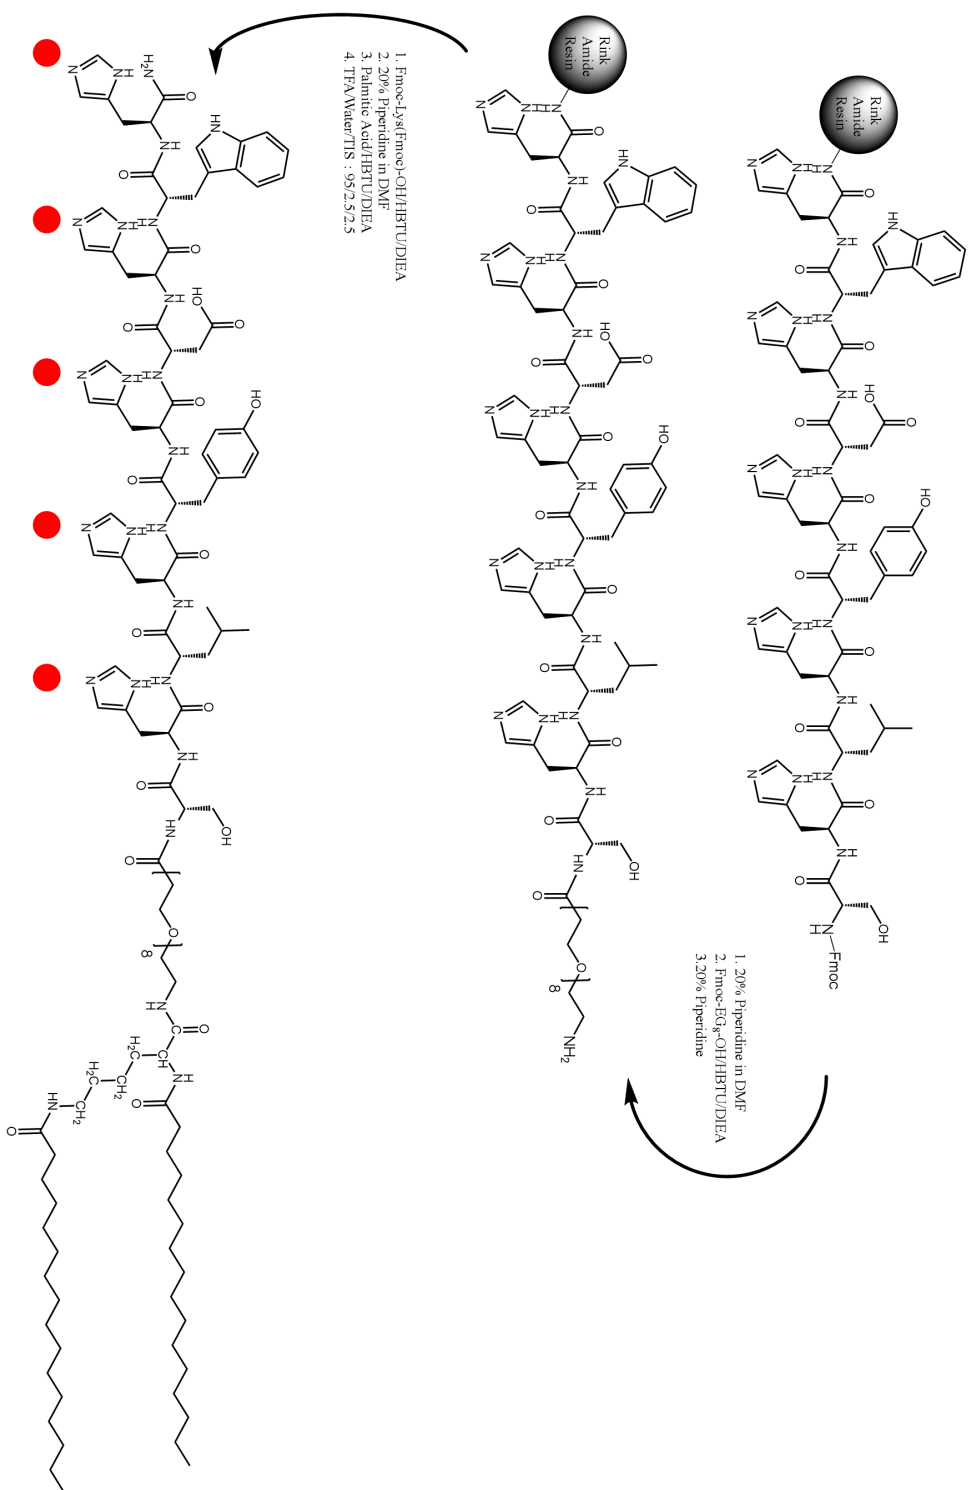

Figure E2

| Compound   | Number of Platin substructures per lipid |   |   |   | Adducts        |                 | Exact Mass<br>(Da) | m/z - Expected (Observed) |                   |                   |
|------------|------------------------------------------|---|---|---|----------------|-----------------|--------------------|---------------------------|-------------------|-------------------|
|            | A                                        | B | C | D | H <sup>+</sup> | Na <sup>+</sup> |                    | +4                        | +3                | +2                |
| Cpt-Lipid  | 1                                        |   |   |   | 2              |                 | 2669.43            | 667.85 (667.86)           |                   |                   |
|            |                                          |   |   |   | 1              |                 |                    |                           | 890.17 (890.19)   |                   |
|            |                                          |   |   |   | 0              |                 |                    |                           |                   | 1334.71 (1334.72) |
|            | 1                                        | 1 |   |   |                |                 | 2896.43            | 724.61 (724.61)           | 965.81 (965.82)   | 1448.21 (1448.22) |
|            | 2                                        |   |   |   |                |                 | 2943.45            | 735.86 (735.88)           | 981.15 (981.16)   |                   |
| 1          | 2                                        |   |   |   |                | 3127.47         | 781.87 (781.86)    |                           |                   |                   |
| Oxpt-Lipid |                                          |   | 1 |   | 2              |                 | 2704.49            | 676.62 (676.63)           |                   |                   |
|            |                                          |   |   |   | 1              |                 |                    |                           | 901.83 (901.83)   |                   |
|            |                                          |   |   |   | 0              |                 |                    |                           |                   | 1352.24 (1352.25) |
|            |                                          |   | 2 |   |                |                 | 3013.57            | 753.39 (753.40)           |                   |                   |
|            |                                          |   | 3 |   |                |                 | 3321.65            | 830.41 (830.42)           | 1106.55 (1106.54) |                   |
|            |                                          |   | 2 | 1 |                | 1               | 3375.68            | 849.67 (849.67)           |                   |                   |
|            |                                          |   | 4 |   |                |                 | 3627.73            | 906.93 (906.91)           | 1209.24 (1209.23) |                   |
|            |                                          |   | 2 | 2 |                | 2               | 3707.73            | 926.93 (926.94)           |                   |                   |
|            |                                          | 5 |   |   |                | 3935.81         | 983.95 (983.95)    | 1311.23 (1311.23)         | 1966.31 (1966.31) |                   |

Note: Observed masses are listed top to bottom from most abundant

A.

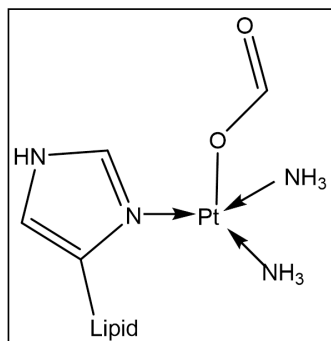

B.

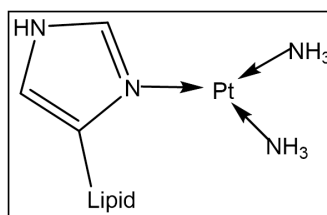

C.

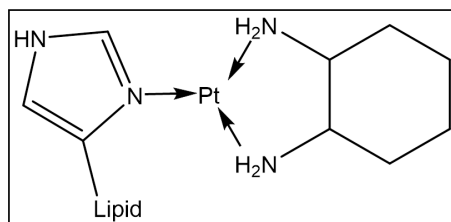

D.

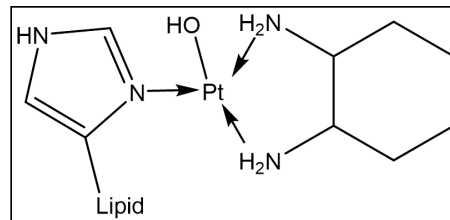

Figure E3

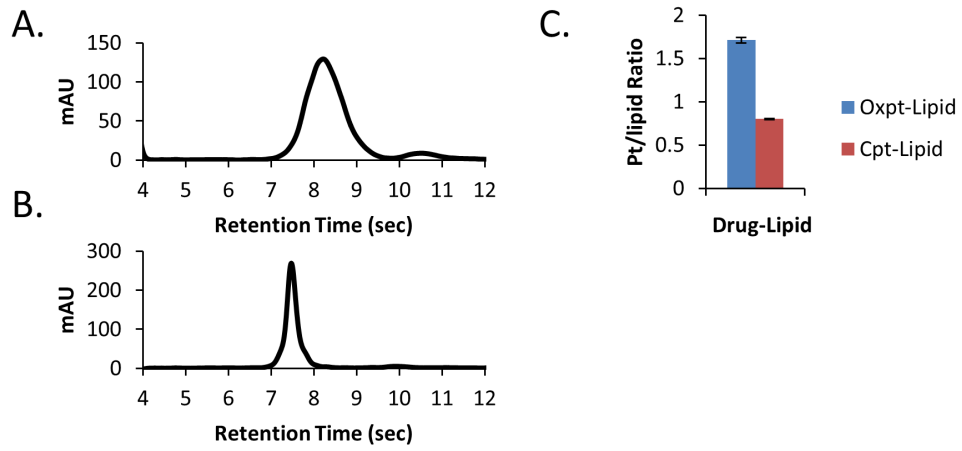

Figure E4

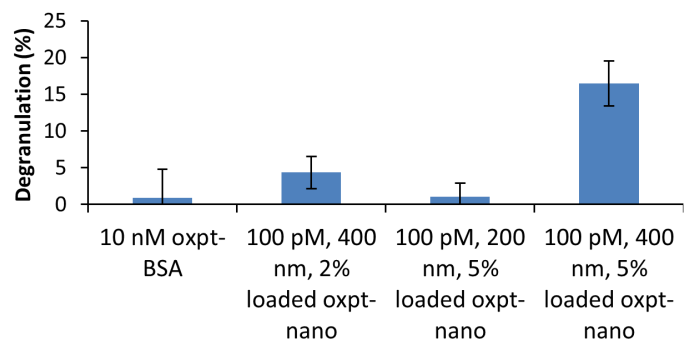

Figure E5

A.

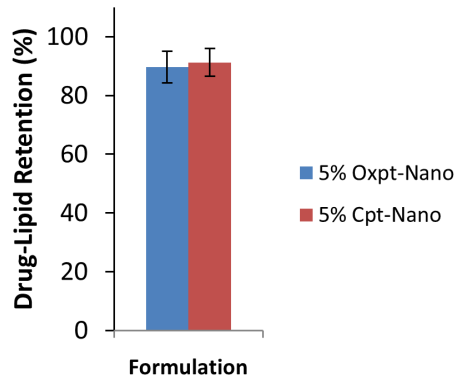

B.

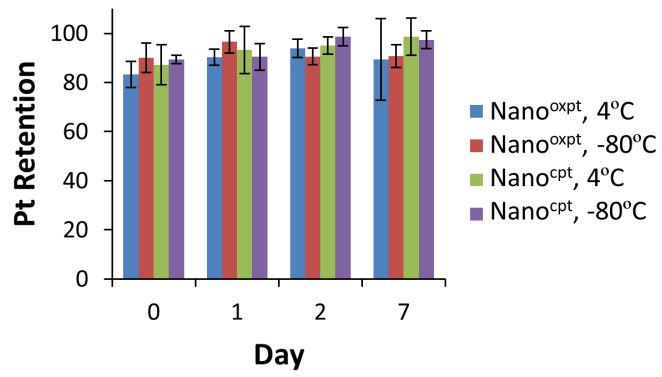

Figure E6

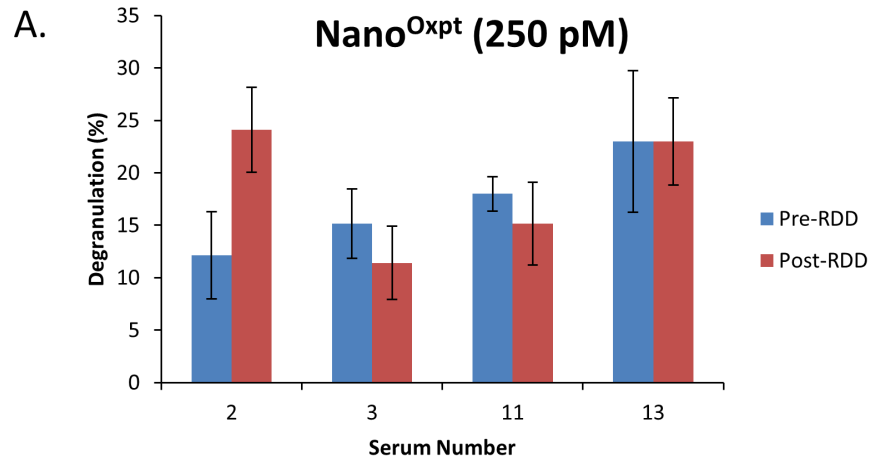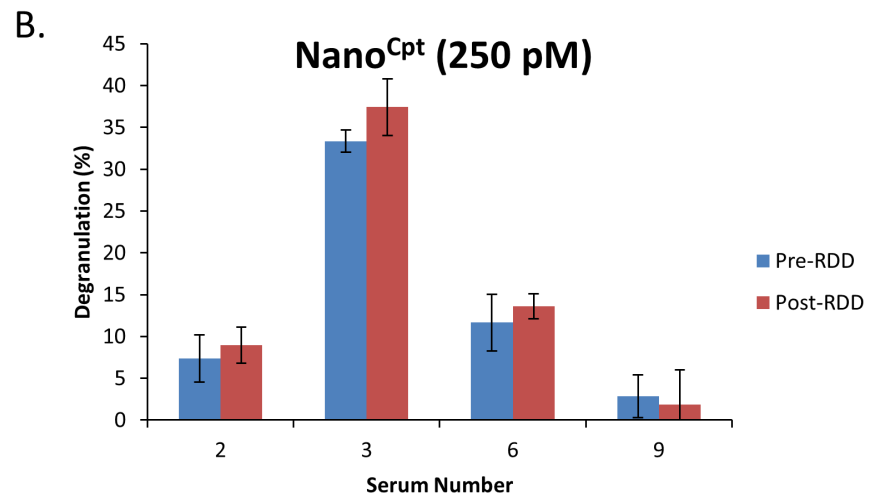

Figure E7

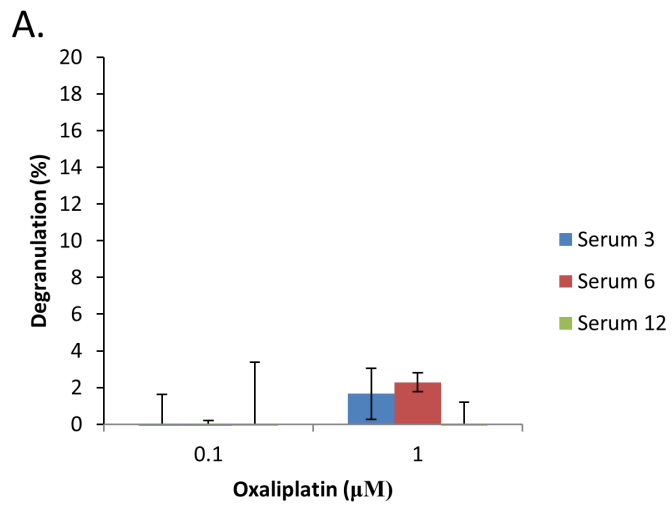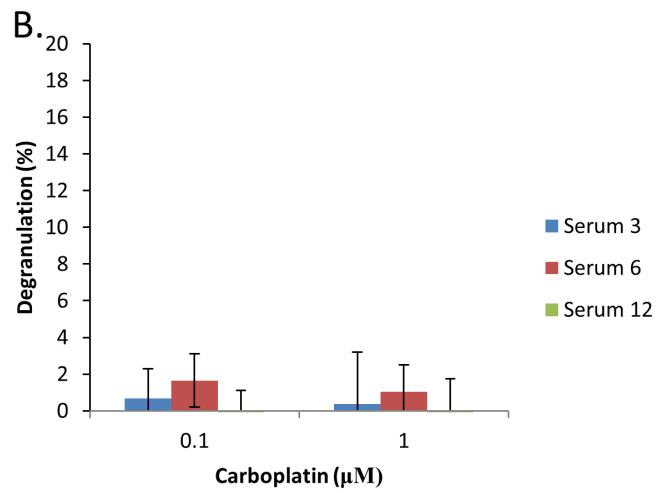

Figure E8

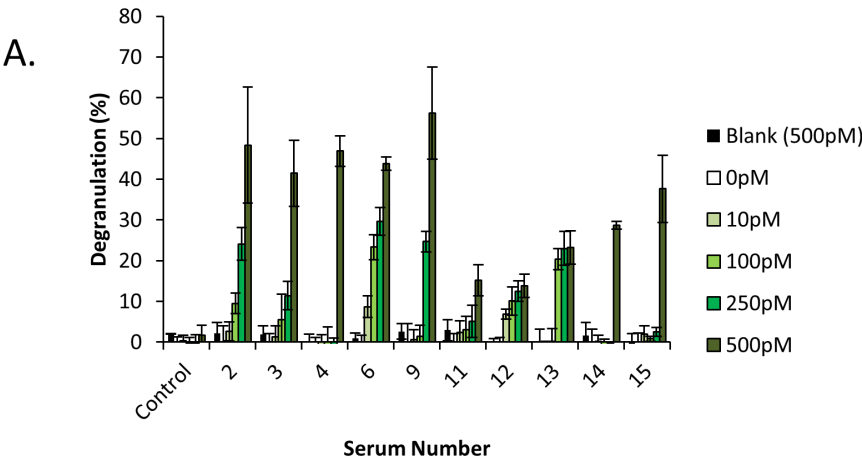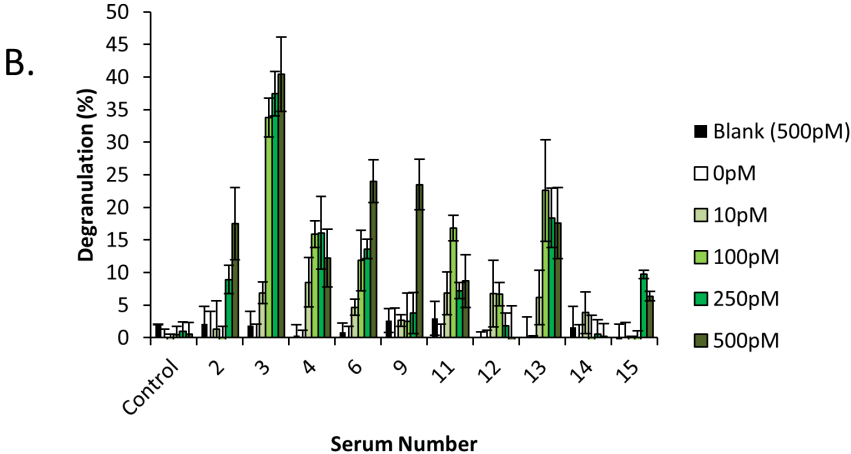



1  
2  
3  
4  
5  
6  
7  
8  
9  
10  
11  
12  
13  
14  
15  
16  
17  
18  
19  
20  
21  
22  
23  
24  
25  
26  
27  
28  
29  
30  
31  
32  
33  
34

**Supplemental Information For: Nanoallergen Platform for the Detection of Platin Drugs Allergies**

Peter E. Deak, PhD<sup>†</sup>, Baksun Kim, MS<sup>†</sup>, Ather Adnan, MS<sup>a</sup>, Marina Labella, MD<sup>a</sup>, Leticia De las Vecillas, MD<sup>a,b</sup>, Mariana Castells, MD, PhD<sup>a</sup> and Basar Bilgicer, PhD<sup>†,‡,§,\*</sup>

<sup>†</sup>Department of Chemical and Biomolecular Engineering, University of Notre Dame, Notre Dame IN 46556

<sup>‡</sup>Advanced Diagnostics and Therapeutics, University of Notre Dame, Notre Dame IN 46556

<sup>§</sup>Department of Chemistry and Biochemistry, University of Notre Dame, Notre Dame IN 46556

<sup>a</sup> Division of Rheumatology, Immunology and Allergy, Department of Medicine, Brigham and Women's Hospital, Harvard Medical School, Boston, Massachusetts, USA.

<sup>b</sup>Department of Allergy, Marqués de Valdecilla University Hospital-IDIVAL, 39011 Santander, Spain

\*Correspondence:

205C McCourtney Hall  
Notre Dame, IN 46556-5637  
Tel: 1 574 631 1429  
fax: 1 574 631 8366  
e-mail: [bbilgicer@nd.edu](mailto:bbilgicer@nd.edu)

## 35 **Materials and Methods**

### 36 **Materials**

37 N-Fmoc-amido-dPEG<sub>8</sub>-acid [Fmoc is also known as fluoren-9-ylmethoxycarbonyl] was purchased from  
38 Quanta BioDesign. All Fmoc protected amino acids, NovaPEG Rink Amide resin, HBTU [2-(1*H*-  
39 benzotriazol-1-yl)-1,1,3,3-tetramethyluroniumhexafluorophosphate], Fmoc-Arg(pfb)-OH and BSA  
40 (Bovine Serum Albumin) was purchased from EMD Biosciences. DIEA (*N,N*-diisopropylethylamine), TFA  
41 (trifluoroacetic acid), Triisopropylsilane (TIS), Cholesterol, Dichloromethane, 2-propanol,  
42 ACN(acetonitrile), DMSO and piperidine were from Sigma and DMF (dimethylformamide) (>99.8%),  
43 chloroform, Minimum Essential Media, goat anti-human IgE was purchased from Thermo Fisher. DSPC  
44 (1,2-distearoyl-*sn*-glycero-3-phosphocholine), DSPE-mPEG2000 (1,2-distearoyl-*sn*-glycero-3-  
45 phosphoethanolamine-*N*-[methoxy(polyethylene glycol)-2000] (ammonium salt)), membranes and all  
46 mini extruder components were purchased from Avanti Polar Lipids (Alabaster, AL, USA). Fetal Bovine  
47 serum and G418 sodium salt was purchased from Gemini Bioproducts (Sacramento, CA). Cytochalasin  
48 D, oxaliplatin (oxpt) and carboplatin (cpt) and 4-MUG (4-Methylumbelliferyl- $\beta$ -D-glucuronide hydrate)  
49 were purchased from Sigma. RBL-2H3 cells were purchased from ATCC and RBL-SX38 cells were a  
50 generous gift from Dr. Jean-Pierre Kinet.

### 51 **Statistical Evaluation**

52 Unless otherwise stated all error bars represent the standard deviation of triplicates in a single  
53 experiment. For degranulation experiments, the data is a representative experiment of several  
54 experiments; all others were a single experiment. EC<sub>50</sub> values and error were calculated using Origin 7  
55 software. All p values were calculated using an unpaired student's t test.

### 56 **Synthesis and purification of Platin-Lipid (oxpt-lipid and cpt-lipid)**

57 Platin lipid conjugates were synthesized in two phases. First, peptide-lipid conjugates were synthesized  
58 using Fmoc chemistry on solid support using NovaPEG Rink Amide resin as previously described.<sup>(1)</sup> The  
59 synthetic scheme is described in Figure E-1. First the peptide (HWHDHYHLHS) was synthesized on the  
60 solid support. Briefly, Fmoc protected amino acids with terminal acid groups were activated with HBTU  
61 and a four-fold molar excess of DIEA for 5 minutes and then conjugated to the resin over 30 minutes.  
62 Fmoc was deprotected with 20% piperidine in DMF. Deprotection and coupling steps were monitored  
63 with Kaiser tests. An Fmoc-amido-dPEG<sub>8</sub>-acid was added in a similar fashion, followed by Fmoc-Lys-  
64 Fmoc-OH. Finally, a lipid tail was added by addition of a palmitic acid tail to form the peptide-lipid.  
65 Peptide-lipid was then cleaved from resin using a 95/2.5/2.5 TFA/water/TIS solution for 45 minutes.  
66 Peptide-lipid molecules were purified using 1200 Agilent RP-HPLC using a semi-preparative Zorbax C3  
67 column. A two phase water and 70/20/10 IPA/ACN/water mix was used for purification with a gradient  
68 of 60-100% IPA mix over 10 minutes at a flow rate of 3 mL min<sup>-1</sup>. The product was confirmed using a  
69 Bruker microTOF II mass spectrometer (m/z, expected: 2430.38, observed: 2430.38). Absorbance peaks  
70 at 220nm and 280nm were collected and verified for purity with analytical injections (>95%).

71 The purified peptide lipid was then incubated with either oxpt or cpt to facilitate conjugation of the  
72 reactive platinum center with nucleophilic histidine residues in the peptide lipid. Briefly, 10 mg of  
73 peptide lipid was dissolved in 5 mL of DMF and 100  $\mu$ L of DIEA is added. In a separate vial, oxpt or cpt is  
74 dissolved: 30 mg of oxpt was dissolved in 600  $\mu$ L of DMSO, or 30 mg of cpt was dissolved in 3 mL of  
75 bicarbonate buffer (pH 10.0). Solutions containing peptide lipid and platin molecule (either oxpt or cpt)  
76 were mixed and incubated for either 48 hours (for oxpt) or for 7 days (for cpt) at 50°C under constant  
77 stirring. After reaction, DMF was removed via rotoevaporation and oxpt-lipid or cpt-lipid purified using  
78 1200 Agilent RP-HPLC using a semi-preparative Zorbax C3 column. A two phase water and 70/20/10  
79 IPA/ACN/water mix was used for purification with a gradient of 60-80% IPA mix over 10 minutes at a

80 flow rate of 3 mL min<sup>-1</sup>. Compounds eluted as multiple peaks, representing various combinations of  
81 platin-peptide reactions (Figure E-2). These multiple peaks were mixed and collected.

## 82 **Nanoallergen Preparation**

83 Liposomal nanoallergens were prepared using a procedure as previously described.(2,3) Briefly, DSPC,  
84 mPEG-2000-DSPC, Cholesterol, and platin-lipids (mixed at a 90:5:5:50 ratio) were dissolved in  
85 chloroform, lyophilized, rehydrated in PBS at 60°C and then extruded through a 400 nm polycarbonate  
86 filter (Avanti). Nanoallergens synthesized with 5% oxpt-lipid were termed nano<sup>oxpt</sup> while nanoallergens  
87 synthesized with 5% cpt-lipid were termed nano<sup>cpt</sup>.

## 88 **Particle Characterization**

89 Liposomes were measured for size using DLS (Dynamic Light Scattering) analysis via the 90Plus  
90 nanoparticle size analyzer (Brookhaven Instruments Corp.), using 658 nm light observed at a fixed angle  
91 of 90° at 20°C. Liposome samples were diluted with 0.22 μM filter sterilized PBS to a 1.25 nM liposome  
92 concentration immediately after extrusion, placed in a 50 μL quartz cuvette and particle sized.

## 93 **Nanoallergen Stability Study**

94 In order to determine the stability of platin-presenting nanoallergens, we synthesized 10 nM solutions of  
95 either nano<sup>oxpt</sup> or nano<sup>cpt</sup> and then either kept them at 4°C or flash froze them in liquid nitrogen and  
96 stored them at -80°C for various time points. Note that flash frozen nanoallergens were extruded in a  
97 90/10 v/w solution of PBS/sucrose in order to maintain particle stability. Particles were then stored for  
98 0, 1, 2 or 7 days and then tested via RP-HPLC and DLS.

## 99 **Cell Culture**

100 RBL-SX38 (human FcεRI expressing)(4) cells were cultured in Minimum Essential Media (Gibco) with 10%  
101 fetal bovine serum (Gemini BioProducts) as previously described.(5) Briefly, every 48 or 72 hours RBL  
102 cells were trypsinized with 1 mL of trypsin-EDTA solution (Thermo Scientific) for 5 minutes at 37°C after

103 achieving confluency ( $\approx 0.5 \times 10^6$  Cells per mL). Then cells were removed from the plate, and split 1:3  
104 into fresh media.

#### 105 **Human Sera and Preparation**

106 Human sera from oncological patients with a previous severe systemic immediate HSR to carboplatin or  
107 to oxaliplatin and/or positive skin test (prick and intradermal) undergoing desensitization were obtained  
108 from Brigham and Women's Hospital. (6-8)

109 All patients included in the study gave written informed consent and were recruited after approved  
110 application from the Biomedical Research-Dana-Farber/Harvard Cancer Center-  
111 BIDMC/BCH/BWH/DFCI/MGH/Partners Network Affiliates (DFCI Protocol Number: 13-288).

112 Blood samples were collected on the day of desensitization (DS) just before the DS and at the end of the  
113 procedure. A yellow cap BD Vacutainer® SST II Advance tube was used to obtain and separate the serum  
114 sample. After a clot was formed, tubes were centrifuged at 2000g for 10 minutes at 25° C. Serum was  
115 collected and stored at -80° C. (7)

116 Allergic patients to oxpt or cpt were desensitized to the culprit drug based on a dose escalation (2-2.5  
117 times) every 15 min. The initial concentration of the solution in a 4 bags/16 steps protocol was 1/1000,  
118 and 1/100 was the first bag concentration in a 3 bags/12 steps protocol, reaching the target dose at the  
119 end of the procedure. (7,9) Standard premedication used was antihistamines antiH1 and antiH2  
120 (Cetirizine, Famotidine) and oncologist's premedication (steroids). Based on symptoms of the first  
121 reaction: aspirin and montelukast were used to prevent flushing or bronchospasm; ativan was used for  
122 anxiety

123 All patients completed the DS and no breakthrough reactions occurred.

124 In addition to these potentially allergic patient sera, control patient serum from healthy individuals were  
125 purchased commercially from PlasmaLabs international. Three different control sera were used and  
126 their degranulation assay results averaged.

127 Prior to degranulation assay, serum was prepared by first spinning down samples to remove precipitates  
128 and diluting into RBL cell culture media (15/85: serum/media). This dilution was added to RBL-2H3 cells  
129 (i.e. non-human FcεRI expressing cells) to remove anti-rat antibodies and other cytotoxic factors for 2  
130 hours.(4) Serum/media mixture was then removed and spun down again to remove dead cells and other  
131 precipitates.

### 132 **Degranulation Assays**

133 RBL-SX38 degranulation assays were performed as previously described following the standard beta  
134 hexosaminidase assay, except using nanoallergens as the allergen.(5) These assays were run in triplicate.  
135 Briefly, cells at 150,000 cells per mL per added to a cell culture 96 well plate (0.1 mL per well) and  
136 allowed to attach to the plate for 16 hours until plate was confluent. Cells were then incubated with  
137 previously prepared serum/media mixture for 16 hours. The next morning, the plate was washed PBS  
138 and incubated with cell culture media for 2-3 hours prior to assay. Then, cells were washed with  
139 Tyrodes buffer (0.2 mL each well, 2 times) and 5 μL of nanoallergen solution were added into 0.095 mL  
140 of Tyrodes in each well. For positive control well, a 5 μg/mL solution of anti-human IgE(Fisher) was  
141 added. After incubating for one hour, 50 μL of cell supernatant solution was added to 50 μL of 1 mM 4-  
142 MUG solution in citrate buffer (pH 4.5) and allowed to incubate at 37°C for 20 mins. This reaction was  
143 stopped by adding a 1 mM solution of glycine (pH 10.7) and read fluorescence (ex. 365/em. 445). To  
144 calculate percent degranulation, the absorbance from the triplicate was averaged and then subtracted  
145 from the negative control and divided by positive control.

146

147

148

149 REFERENCES

150 (1) Stefanick JF, Kiziltepe T, Bilgicer B. Improved Peptide-Targeted Liposome Design Through Optimized  
151 Peptide Hydrophilicity, Ethylene Glycol Linker Length, and Peptide Density. *J Biomed Nanotechnol*  
152 2014;In Print.

153 (2) Stefanick JF, Ashley JD, Kiziltepe T, Bilgicer B. A Systematic Analysis of Peptide Linker Length and  
154 Liposomal Polyethylene Glycol Coating on Cellular Uptake of Peptide-Targeted Liposomes. *ACS Nano*  
155 2013;7 (4):2935-2947.

156 (3) Stefanick JF, Ashley JD, Bilgicer B. Enhanced Cellular Uptake of Peptide-Targeted Nanoparticles  
157 through Increased Peptide Hydrophilicity and Optimized Ethylene Glycol Peptide-Linker Length. *ACS*  
158 *Nano* 2013;7 (9):8115-8127.

159 (4) Ladics GS, van Bilsen JHM, Brouwer HMH, Vogel L, Vieths S, Knippels LMJ. Assessment of three  
160 human Fc epsilon RI-transfected RBL cell-lines for identifying IgE induced degranulation utilizing pea nut-  
161 allergic patient sera and peanut protein extract. *Regulatory Toxicology and Pharmacology* 2008  
162 AUG;51(3):288-294.

163 (5) Deak PE, Vrabel MR, Kiziltepe T, Bilgicer B. Determination of Crucial Immunogenic Epitopes in Major  
164 Peanut Allergy Protein, Ara h2, via Novel Nanoallergen Platform. *Scientific Reports* 2017 JUN 21;7:3981.

165 (6) Sloane D, Govindarajulu U, Harrow-Mortelliti J, Barry W, Hsu FI, Hong D, et al. Safety, Costs, and  
166 Efficacy of Rapid Drug Desensitizations to Chemotherapy and Monoclonal Antibodies. *Journal of Allergy*  
167 *and Clinical Immunology-in Practice* 2016 MAY-JUN;4(3):497-504.

168 (7) Caiado J, Venemalm L, Pereira-Santos MC, Costa L, Barbosa MP, Castells M. Carboplatin-, Oxaliplatin-,  
169 and Cisplatin-specific IgE: Cross-reactivity and Value in the Diagnosis of Carboplatin and Oxaliplatin  
170 Allergy. *Journal of Allergy and Clinical Immunology-in Practice* 2013 SEP-OCT;1(5):494-500.

171 (8) Castells M. Drug Hypersensitivity and Anaphylaxis in Cancer and Chronic Inflammatory Diseases: The  
172 Role of Desensitizations. *Frontiers in Immunology* 2017 NOV 8;8:1472.

173 (9) de las Vecillas Sanchez L, Alenazy LA, Garcia-Neuer M, Castells MC. Drug Hypersensitivity and  
174 Desensitizations: Mechanisms and New Approaches. *International Journal of Molecular Sciences* 2017  
175 JUN;18(6):1316.

176

177

178 Supplemental Figure Legends

179 Figure E-1. Synthetic Scheme for peptide-lipid. The peptide HWHDHYHLHS was synthesized using Fmoc  
180 solid phase peptide synthesis techniques. After peptide addition, and EG<sub>8</sub> spacer was added followed by  
181 addition of a palmitic acid tail. A red dot indicates a potential platinum conjugation site.

182 Figure E-2. Predicted Platinum-Lipid Structures from MS analysis. Substructures listed below table

183 Figure E-3. Purity and Platinum Ratio of oxpt-lipid and cpt-lipid. (A) RP-HPLC analysis of purified oxpt-  
184 lipid. Note the broad peak indicating a mixture of several types of oxpt-lipids. (B) RP-HPLC analysis of  
185 purified cpt-lipid. Note the broad peak indicating a mixture of several types of oxpt-lipids. Both  
186 compounds demonstrated >95% purity. (C) Ratio of platinum atoms (as determined by ICP analysis) per  
187 peptide-lipid molecules (as determined by tryptophan absorbance) for both oxpt-lipid and cpt-lipid.  
188 Error bar indicate ± STD of triplicate experiments.

189 Figure E-4. Comparison of various nanoallergen formulations on degranulation sensitivities. 4  
190 formulations were synthesized and then tested by RBL cell assay with patient serum 12. From left to  
191 right (1) 10 nM of a BSA protein conjugated with an average of 8 oxpt per protein (oxpt-BSA), (2) 100 pM  
192 of a 400 nm nanoallergen loaded with 2% oxpt-lipid, (3) 100 pM of a 200 nm nanoallergen loaded with  
193 5% oxpt-lipid, (4) 100 pM of a 400 nm liposome loaded with 5% oxpt-lipid (nano<sup>Oxpt</sup>). Error bar indicate ±  
194 STD of triplicate experiments.

195 Figure E-5. Nanoallergens retain platinum metabolites. (A) A solution of freshly extruded 10 nM Nano<sup>Oxpt</sup> or  
196 Nano<sup>Cpt</sup> in PBS was tested with RP-HPLC before and after rehydration and extrusion and the peak areas  
197 compared to calculate a drug-lipid retention. Both nanoallergens retain >90% of drug-lipid after  
198 liposome formation. (B) A 2 nM solution of 10 nM Nano<sup>Oxpt</sup> or Nano<sup>Cpt</sup> was either kept at 4°C or flash  
199 frozen in a 10% sucrose solution and kept at -80°C for 1, 2 or 7 days. Solutions were then purified with  
200 LEP and pre and post-purification samples were tested with ICP. Pt retention was determined by  
201 comparing pre and post purification Pt concentration. Error bar indicate ± STD of triplicate experiments.

202 Figure E-6. RDD does not alter IgE induced degranulation to nanoallergens. Human FcεRI expressing  
203 RBL-SX38 cells were primed with serum from patients before or after RDD (15% serum/85% media)  
204 overnight, washed and degranulation triggered by incubating with (A) 250 pM Nano<sup>Oxpt</sup> or (B) 250 pM  
205 Nano<sup>Cpt</sup> and degranulation measuring using a beta-hexosaminidase assay. Error bar indicate ± STD of  
206 triplicate experiments.

207 Figure E-7. Free platinum drugs do not induce RBL degranulation. RBL-SX38 cells were primed with serum  
208 from patients 3, 6, or 12 (15%) and then incubated with either free oxaliplatin (A) or carboplatin (B).  
209 Concentrations above 1 μM demonstrated high cytotoxicity (data not shown).

210 Figure E-8. Nanoallergen Degranulation Data. RBL degranulation data for all nanoallergen-serum  
211 combinations. Human FcεRI expressing RBL-SX38 cells were primed with serum from patients before or  
212 after RDD (15% serum/85% media) overnight, washed and degranulation triggered with either (A)  
213 nano<sup>Oxpt</sup> or (B) nano<sup>Cpt</sup>. Error bar indicate ± STD of triplicate experiments.



1 Table E-1. Particle Size Stability.

|       | Nano <sup>Oxpt</sup> |      |       |       |                 |      |       |       |
|-------|----------------------|------|-------|-------|-----------------|------|-------|-------|
|       | Stored at 4°C        |      |       |       | Stored at -80°C |      |       |       |
|       | Diameter(nm)         | S.E  | P.D   | S.E   | Diameter(nm)    | S.E  | P.D   | S.E   |
| Day 0 | 368.74               | 6.21 | 0.18  | 0.053 | 391.67          | 3.3  | 0.176 | 0.059 |
| Day 1 | 367.25               | 2.91 | 0.187 | 0.012 | 387.25          | 1.72 | 0.148 | 0.022 |
| Day 2 | 372.94               | 1.69 | 0.159 | 0.02  | 395.74          | 1.48 | 0.183 | 0.025 |
| Day 7 | 414.17               | 1.79 | 0.23  | 0.018 | 385.92          | 1.74 | 0.166 | 0.017 |

|       | Nano <sup>Cpt</sup> |      |       |       |                 |      |       |       |
|-------|---------------------|------|-------|-------|-----------------|------|-------|-------|
|       | Stored at 4°C       |      |       |       | Stored at -80°C |      |       |       |
|       | Diameter(nm)        | S.E  | P.D   | S.E   | Diameter(nm)    | S.E  | P.D   | S.E   |
| Day 0 | 384.76              | 2.89 | 0.188 | 0.036 | 450.51          | 3.5  | 0.145 | 0.023 |
| Day 1 | 398.13              | 5.99 | 0.196 | 0.015 | 443.81          | 3.54 | 0.161 | 0.008 |
| Day 2 | 399.7               | 3.5  | 0.133 | 0.021 | 439.99          | 2.43 | 0.181 | 0.021 |
| Day 7 | 399.37              | 3.78 | 0.135 | 0.028 | 441.07          | 2.21 | 0.188 | 0.023 |

2

3

4

\* S.E- Standard Error; P.D.- Polydispersity. Nanoallergens stored at -80°C were extruded in a 10/90 sucrose/PBS solution (w/v) and then flash frozen in liquid nitrogen before storage.

Table E-2. Patient Demographics

1

| Patient | Sex | Age | Drug        | Type of cancer | Number of lifetime infusions prior to reaction | Rxn Grade | Symptoms during reaction                                                                             | Skin tests                              | Atopy                                                                                                                                                            | Tryptase (ng/ml)                                           |
|---------|-----|-----|-------------|----------------|------------------------------------------------|-----------|------------------------------------------------------------------------------------------------------|-----------------------------------------|------------------------------------------------------------------------------------------------------------------------------------------------------------------|------------------------------------------------------------|
| 2       | F   | 75  | Carboplatin | Ovarian        | >10                                            | 1         | Flushing and itching                                                                                 | Positive at 1 <sup>st</sup> ID (1mg/ml) | Rhinitis and asthma, drug allergy (flushing with levofloxacin)                                                                                                   | 18.2 (during 1 <sup>st</sup> RDD)<br>5.7 (baseline)        |
| 3       | F   | 68  | Carboplatin | Uterus         | 16                                             | 3         | Itchy palms and feet, flushing, back pain and throat itchiness                                       | Positive at 1 <sup>st</sup> ID (1mg/ml) | Seasonal rhinitis, drug allergy (spotty vision and fainting with 1 <sup>st</sup> lifetime Taxol)                                                                 | 11.5 (during reaction)<br>4.4 (baseline)                   |
| 4       | F   | 64  | Carboplatin | Ovarian        | 10                                             | 2         | Pruritis, nausea, facial flushing, feeling of impending doom, hypertension, tachycardia and GI upset | Positive at 1 <sup>st</sup> ID (1mg/ml) | None                                                                                                                                                             | 5.5 (during reaction)                                      |
| 6       | F   | 67  | Carboplatin | Ovarian        | >8                                             | 3         | Throat discomfort, nausea, flushed and swollen face and hypotension                                  | Positive at prick (10mg/ml)             | None                                                                                                                                                             | 29 (during reaction)<br>12.2 (baseline)<br>13.9 (baseline) |
| 9       | F   | 78  | Carboplatin | Ovarian        | >10                                            | 1         | Nose flushing and palmar itching                                                                     | Positive at 1 <sup>st</sup> ID (1mg/ml) | Blisters with adhesive tape and seasonal conjunctivitis                                                                                                          | Not done                                                   |
| 11      | M   | 53  | Oxaliplatin | Colon          | >6                                             | 1         | Tingling lips and hives on wrists, elbows and neck                                                   | Positive at prick (5mg/ml)              | Seasonal rhinitis                                                                                                                                                | 4 (baseline)                                               |
| 12      | M   | 68  | Oxaliplatin | Colon          | >6                                             | 3         | Unresponsiveness and bladder and bowel incontinence                                                  | Positive at prick (5mg/ml)              | None                                                                                                                                                             | Not done                                                   |
| 13      | F   | 48  | Oxaliplatin | Colon          | 0                                              | 3         | Body flushing, hypotension and desaturation                                                          | Not done                                | Allergic rhinitis and conjunctivitis, eczema, chronic idiopathic urticaria, drug hypersensitivity (iron, latex, penicillin); patient under treatment with Xolair | 3.8 (baseline)                                             |
| 14      | F   | 60  | Oxaliplatin | Pancreatic     | 6                                              | 2         | Chest and throat tightness, shortness of breath, tongue swelling and sweating                        | Positive at 2 <sup>nd</sup> ID (5mg/ml) | Asthma, drug allergy (irinotecan), food allergy (peach, apricot, nectarine)                                                                                      | Not done                                                   |
| 15      | F   | 54  | Carboplatin | Tongue         | 9                                              | 2         | Chest tightness, shortness of breath and whole body flushing                                         | Positive at 1 <sup>st</sup> ID (1mg/ml) | Seasonal allergies (ragweed)                                                                                                                                     | 5.4 (during reaction)                                      |

\*Based on Brown's classification  
F: female; M: male.
